# Supplementary material for: Unique roles of iron and zinc binding to the yeast Fe–S cluster scaffold assembly protein “Isu1”
Source: Royal Society of Chemistry journal article supplement (doi:10.1039/c9mt00172g), 2019-01-01
Supplement: c9mt00172g1.pdf [file c9mt00172g1.pdf]

## ***Supplemental Figures and Tables for***

*Unique roles of iron and zinc binding to the yeast*

*Fe-S cluster scaffold assembly protein “Isu1”*

*Brianne E. Lewis<sup>‡</sup>, Zachary Mason<sup>‡</sup>, Andria V. Rodrigues<sup>‡</sup>, Manunya Nuth<sup>°</sup>, Eric Dizin<sup>°</sup>, J. A. Cowan<sup>°</sup>, and  
Timothy L. Stemmler<sup>‡,\*</sup>*

<sup>‡</sup>Department of Pharmaceutical Science, Wayne State University, Detroit, MI 48201; <sup>°</sup>Department of Chemistry, The Ohio State University, Columbus, OH 43210.

### **Corresponding Author**

\* Dr. Timothy L. Stemmler

259 Mack Avenue, Eugene Applebaum College of Pharmacy and Health Sciences, Detroit, MI 48201

313-577-5712, [timothy.stemmler@wayne.edu](mailto:timothy.stemmler@wayne.edu)

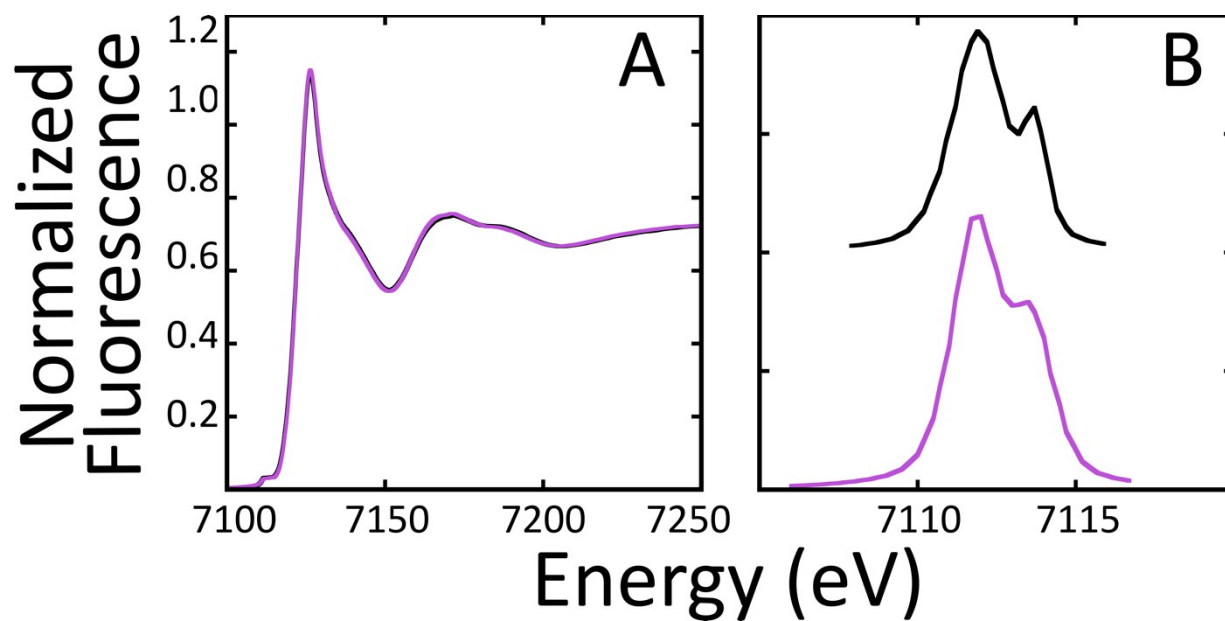

**Supplemental Figure 1. Normalized Fe XANES for Zn/Fe Loaded Isu1 Samples Following a Unique Sequential Loading Order (i.e., Fe then Zn loading, and Zn then Fe loading of Isu1).** All samples were eventually loaded with 1 equivalent zinc and 2 equivalents iron, although the loading order was varied. (A) Fe-XANES for iron loaded first shown above in purple while the Zn loaded first sample is shown in black. (B) Respective iron pre-edge features are shown for iron loaded first (purple) and zinc loaded first (black).

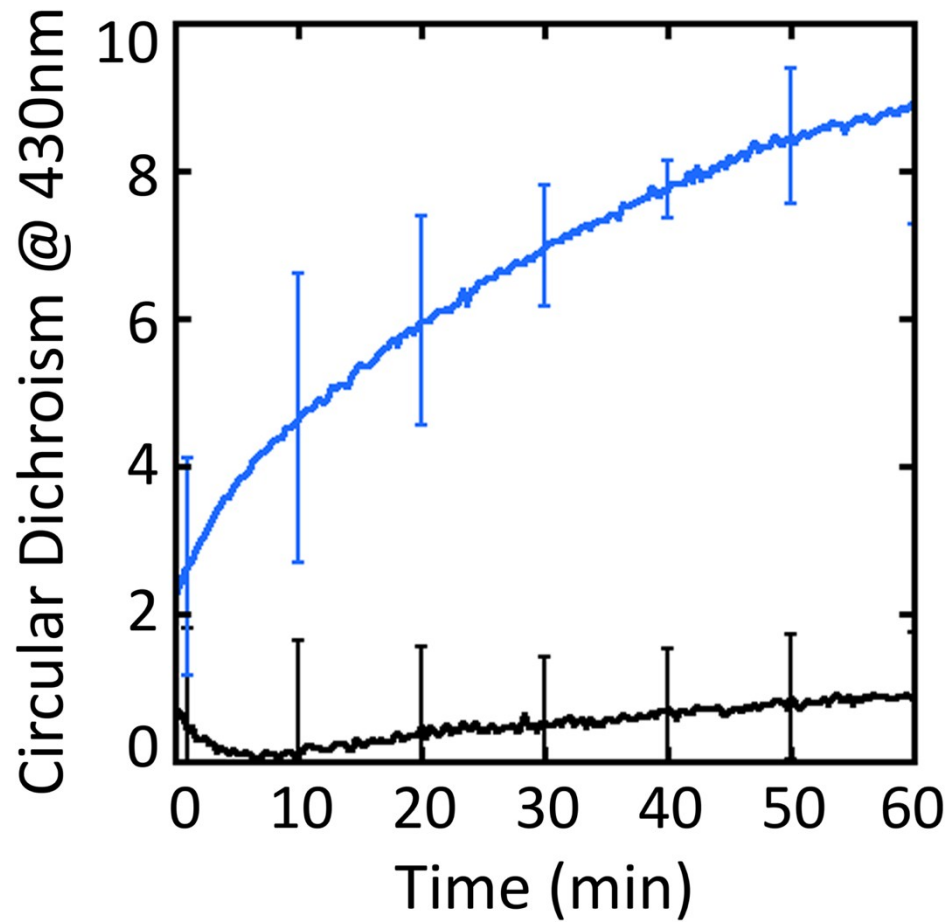

**Supplemental Figure 2. Fe-S cluster assembly assay.** Cluster assembly assay detected by Circular Dichroism Spectroscopy at 430 nm using NIA, Yfh1, Fe(II), *L*-Cys, DTT and either with apo-Isu1 (blue) or Zn-Isu1 (black).

**Supplemental Table 1. Summary of ICP-MS analysis of the iron and zinc concentrations found in apo-Isu1, as well as Fe(II), Zn(II) and Fe(II)/Zn(II) loaded XAS samples.**

| <b>Sample</b>             | <b>Isu1 Concentration<br/>(<math>\mu</math>M)</b> | <b>Fe Concentration<br/>(<math>\mu</math>M)</b> | <b>Zn Concentration<br/>(<math>\mu</math>M)</b> |
|---------------------------|---------------------------------------------------|-------------------------------------------------|-------------------------------------------------|
| Apo-Isu1 <sup>a</sup>     | 346.5 $\pm$ 163.5                                 | 2.0 $\pm$ 1.1                                   | 2.2 $\pm$ 1.2                                   |
| 2Fe-Isu1 <sup>b</sup>     | 581.5 $\pm$ 56.5                                  | 427.1 $\pm$ 38.6                                | 6.0 $\pm$ 3.0                                   |
| 1Zn-Isu1 <sup>c</sup>     | 546.5 $\pm$ 91.5                                  | 11.7 $\pm$ 12.6                                 | 582.6 $\pm$ 300.9                               |
| 1Zn/2Fe-Isu1 <sup>d</sup> | 577.0 $\pm$ 122.0                                 | 838.7 $\pm$ 354.5                               | 526.7 $\pm$ 328.6                               |

<sup>a</sup> Analysis from 4 apo-Isu1 samples isolated from 2 independent reproducible protein purifications.

<sup>b</sup> Analysis from 2 independently prepared 2Fe-Isu1 XAS samples.

<sup>c</sup> Analysis from 2 independently prepared 1Zn-Isu1 XAS samples.

<sup>d</sup> Analysis from 3 independently prepared 1Zn/2Fe-Isu1 XAS samples.

**Supplemental Table 2. Fe XANES Pre-edge Area and eV Inflection Analysis from Varying the Fe/Zn Addition Order.** Pre-edge areas of the 1s→3d transition signal for Fe(II) within samples measured in dimensionless values.<sup>30</sup> Peak inflection energy values were calculated as the edge first derivate of the edge.

|                                | Pre-Edge Area <sup>a</sup> | Peak Inflection (eV) |
|--------------------------------|----------------------------|----------------------|
| 1Zn-2Fe-Isu1 (Zn loaded first) | 4.04 ± 1.34                | 7122.7 ± 1.3         |
| 1Zn-2Fe-Isu1 (Fe loaded first) | 3.67                       | 7121.5               |

<sup>a</sup> Dimensionless area values.
